# Supplementary material for: Improved data quality and statistical power of trial-level event-related potentials with Bayesian random-shift Gaussian processes
Source: PubMed Central journal article supplement (PMC11024164; doi:10.1038/s41598-024-59579-2), 2024-04-17
Supplement: 41598_2024_59579_MOESM1_ESM.pdf [file 41598_2024_59579_MOESM1_ESM.pdf]

# Improved Data Quality and Statistical Power of Trial-Level Event-Related Potentials with Bayesian Random-Shift Gaussian Processes

Dustin Pluta<sup>†, 1</sup> | Beniamino Hadj-Amar<sup>†, 2</sup> | Meng Li<sup>2</sup> |  
 Yongxiang Zhao<sup>3</sup> | Francesco Versace<sup>4</sup> | Marina Vannucci<sup>\*, 2</sup>

## 1 A | SUPPLEMENTARY MATERIAL

### 2 A.1 | Performance assessment on simulated data

3 We use simulated data to further investigate performance of the proposed RPAGP model to reconstruct the structural  
 4 signal. First we simulated data that follow the general structure suggested by the real ERP data of our application.  
 5 In particular, we generated data from our model (Eq. (2) in the main paper) for two categories labeled A and B. The  
 6 common structural signal  $f$  was drawn from  $\mathcal{GP}(0, \kappa_{SE})$  with  $\rho = 10$ , realized at  $T = 50$  points. We generated half of  
 7 the trials with amplitude parameters drawn as  $\beta_{i:c_i=A} \sim \mathcal{N}(1, \sigma_\beta)$  and half as  $\beta_{i:c_i=B} \sim \mathcal{N}(1.5, \sigma_\beta)$ . Latency parameters  
 8 were drawn from the same distribution for all trials as  $\tau_i \sim \mathcal{N}(0, \sigma_\tau)$ . Ongoing activity  $v_i$  was generated as an  $AR(2)$   
 9 process with coefficients  $\phi_1 = 0.5$ ,  $\phi_2 = 0.1$  and white-noise variance  $\sigma_\varepsilon$ . We investigated performances for different  
 10 values of the parameters  $\sigma_\beta$ ,  $\sigma_\tau$  and  $\sigma_\varepsilon$ . Figure A.1 shows the true structural signal  $f$  and the simulated trial-level data  
 11 for one dataset simulated with  $\sigma_\beta = 0.1$ ,  $\sigma_\tau = 0.01$  and  $\sigma_\varepsilon = 0.1$  and  $n = 30$ .

12 In all cases, we set hyperparameters to specify weakly informative priors, similar to those chosen in the real ERP  
 13 data application. In order to ensure identifiability of the  $\beta$  parameters, we fixed  $f(0.5) = m$ , with  $m$  chosen as the  
 14 empirical mean of all trials at this time. We consequently chose the prior  $\beta_i \stackrel{ind}{\sim} \mathcal{N}(1, 0.1)$  to place the majority of the  
 15 prior mass on  $(0, 2)$ ,  $\sigma_\tau^2 = 0.01$  to put approximately 95% of marginal prior mass for latencies equal to  $\pm 10$  time points,  
 16 or shifts of  $\pm 20\%$  of the time window in Figure A.1, and  $a_\rho = 12$ ,  $b_\rho = 1$  to give a wide range of “plausible” GP length  
 17 scales. The RPAGP model was fit via the algorithm described in the main paper, with  $B = 3,000$  MCMC draws. On a  
 18 MacBook Pro computer with 2 GHz Quad-Core Intel Core i5 and 16 GB RAM, this took about 30 minutes, for each  
 19 replicated dataset. Proposal distribution variances were set at 0.001 and 1 for  $\tau$  and  $\rho$ , respectively. Convergence of  
 20 all parameters was assessed by inspecting the Gelman-Rubin diagnostic measure  $\hat{R}$  and the effective sample sizes for  
 21 all parameter posterior samples.

22 The RPAGP estimate  $\tilde{f} = \tilde{\beta} \hat{f}$ , computed as the posterior median of the distribution of the temporally-aligned trial  
 23 estimates, for one dataset simulated with  $\sigma_\beta = 0.1$ ,  $\sigma_\tau = 0.01$  and  $\sigma_\varepsilon = 0.1$  and  $n = 30$  is shown in Figure A.1. It  
 24 is evident that, for this example data, the empirical mean tends to be attenuated toward 0 relative to the structural  
 25 signal, due to the presence of random latencies across the trials. By adjusting for the trial-specific latencies, the model  
 26 is able to provide a more accurate estimate of the true structural signals relative to the empirical means.

27 Next, we investigated performances on replicated datasets. For each simulated dataset, we estimated the scaled

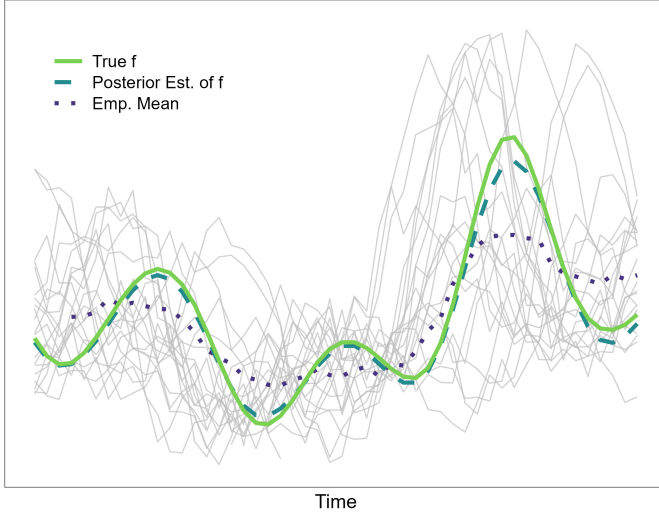

**FIGURE A.1 Simulation study:** Example of data generated from our model (Eq. (2) in the main paper). The true structural signal  $f$  (solid) is accurately recovered by the RPAGP estimate  $\tilde{f} = \widehat{\beta}f$  (dashed). By comparison, the peaks of the empirical mean (dotted) show substantial flattening relative to the true  $f$  due to the latency present in the trial data.

28 structural signal  $\tilde{f}$  and calculated the  $L_2$  error for the model estimate as  $Err_f^2(\tilde{f}) = \frac{1}{T} \sum_{t=1}^T (f(t) - \tilde{f}(t))^2$ . We considered  
 29 35 replicates for each simulated scenario and computed mean squared errors (MSEs) by averaging the squared  $L_2$  error  
 30 across the 35 replicates. Results are reported in Table A.1 where we also show the MSEs obtained by estimating the  
 31 true structural signal by the empirical mean of the raw data. Results clearly indicate that the RPAGP reconstruction of  
 32 the true signal is stable with respect to the latency variance, whereas the accuracy of the empirical mean deteriorates  
 33 drastically as the variance increases. The empirical mean and model estimate are similarly accurate when there is  
 34 no trial-specific latency ( $\sigma_\tau = 0$ ); when some latency is present ( $\sigma_\tau = 0.1$ ), the model consistently outperforms the  
 35 empirical estimate; when the variability of the latency across trials is increased ( $\sigma_\tau = 0.1$ ), the model estimate remains  
 36 relatively accurate while the empirical estimate continues to degrade.

## 37 A.2 | Two-group power analysis on simulated data

38 For further investigation, we performed a two-group power analysis on simulated data with varying numbers of trials  
 39 and by generating data with different signal-to-noise ratios. The simulation design and settings follow those used for  
 40 Table A.1, with data generated with half of the trials having amplitude from  $\mathcal{N}(1, \sigma_\beta)$  and half from  $\mathcal{N}(1.5, \sigma_\beta)$ , repre-  
 41 senting data from two different experimental conditions. For each replicate of this simulation, we drew a component  
 42 curve  $f \sim \mathcal{GP}(0, \kappa_{SE})$ , realized at  $T = 50$  points. From  $f$ , we created  $n$  signals by sampling trial-specific latencies  
 43  $\tau \sim \mathcal{N}(\mu_\tau, \sigma_\tau^2 I_n)$  and amplitudes  $\beta \sim \mathcal{N}(\mu_\beta, \sigma_\beta^2 I_n)$ , where  $\mu_\tau$  and  $\mu_\beta$  are vectors of length  $n$ . The synthetic data  $y_i$   
 44 for trial  $i$  was then generated from our model (Eq. (2) in the main paper) by adding  $AR(2)$  noise  $v_i$  and white noise  
 45  $\varepsilon_i$  to the signal  $\beta_i f(t - \tau_i), i = 1, \dots, n$ . Each setting was replicated 35 times. For convenience in displaying results,  
 46 we calculate a signal-to-noise ratio for each simulation setting as  $SNR = \frac{\Delta\beta}{\sigma_\beta + 2\sigma_\tau}$ , where  $\Delta\beta$  is the difference in mean  
 47 amplitudes between the two groups. This gives an approximate measure of the difficulty of the test in each setting.

| $\sigma_\beta$ | $\sigma_\tau$ | $\sigma_\varepsilon$ | Emp. MSE             | RPAGP MSE            |
|----------------|---------------|----------------------|----------------------|----------------------|
| 0.01           | 0             | 0.1                  | 0.051 (0.025, 0.187) | 0.050 (0.023, 0.265) |
| 0.1            | 0             | 0.1                  | 0.064 (0.017, 0.163) | 0.050 (0.015, 0.179) |
| 0.2            | 0             | 0.1                  | 0.057 (0.013, 0.121) | 0.047 (0.012, 0.091) |
| 0.01           | 0.1           | 0.1                  | 0.108 (0.054, 0.208) | 0.061 (0.002, 0.294) |
| 0.1            | 0.1           | 0.1                  | 0.086 (0.042, 0.222) | 0.065 (0.008, 0.302) |
| 0.2            | 0.1           | 0.1                  | 0.095 (0.054, 0.231) | 0.106 (0.021, 1.387) |
| 0.01           | 0.2           | 0.1                  | 0.257 (0.056, 0.819) | 0.115 (0.009, 0.571) |
| 0.1            | 0.2           | 0.1                  | 0.239 (0.103, 0.581) | 0.113 (0.003, 0.519) |

**TABLE A.1 Simulation study:** Results for data generated with half of the trials having amplitude from  $\mathcal{N}(1, \sigma_\beta)$  and half from  $\mathcal{N}(1.5, \sigma_\beta)$ , latency parameters drawn for all trials as  $\tau_i \sim \mathcal{N}(0, \sigma_\tau)$  and AR(2) ongoing activity with white-noise variance  $\sigma_\varepsilon$ .

| $\sigma_\beta$ | $\sigma_\tau$ | 1/SNR | EMP      |          |          | RPAGP    |          |          |
|----------------|---------------|-------|----------|----------|----------|----------|----------|----------|
|                |               |       | $n = 10$ | $n = 20$ | $n = 30$ | $n = 10$ | $n = 20$ | $n = 30$ |
| 0.01           | 0             | 0.02  | 0.35     | 0.35     | 0.35     | 0.77     | 0.89     | 0.94     |
| 0.1            | 0             | 0.2   | 0.35     | 0.35     | 0.35     | 0.86     | 0.91     | 0.91     |
| 0.2            | 0             | 0.4   | 0.35     | 0.35     | 0.35     | 0.97     | 0.89     | 0.94     |
| 0.01           | 0.1           | 0.42  | 0.30     | 0.25     | 0.30     | 0.69     | 0.83     | 0.83     |
| 0.1            | 0.1           | 0.6   | 0.30     | 0.20     | 0.25     | 0.71     | 0.89     | 0.83     |
| 0.2            | 0.1           | 0.8   | 0.30     | 0.20     | 0.25     | 0.80     | 0.83     | 0.80     |
| 0.01           | 0.2           | 0.82  | 0.30     | 0.20     | 0.20     | 0.34     | 0.74     | 0.74     |
| 0.1            | 0.2           | 1.0   | 0.30     | 0.20     | 0.15     | 0.49     | 0.69     | 0.77     |

**TABLE A.2 Simulation study:** Estimated power for RPAGP and empirical tests for group differences. The signal-to-noise ratio (SNR) approximately quantifies the difficulty of the test setting at a given sample size. Power was calculated from 35 replicates per simulation setting. In most cases, RPAGP shows substantially greater power than the empirical method.

| $a_\rho$ | $\sigma_\tau$ | $\mu_\beta$ | $\beta$ Ratio Err. | $MSE_\tau(\hat{\tau})$ |
|----------|---------------|-------------|--------------------|------------------------|
| 10       | 0.1           | 0.5         | 0.307              | 0.015                  |
| 10       | 0.1           | 1           | -0.155             | 0.016                  |
| 10       | 0.1           | 2           | -0.0937            | 0.016                  |
| 10       | 0.1           | 10          | 0.663              | 0.017                  |
| 10       | 0.05          | 1           | 0.168              | 0.0127                 |
| 10       | 0.25          | 1           | 0.159              | 0.0135                 |
| 10       | 0.5           | 1           | 0.199              | 0.0142                 |
| 10       | 1             | 1           | 0.203              | 0.0146                 |
| 1        | 0.1           | 1           | 0.201              | 0.0144                 |
| 5        | 0.1           | 1           | 0.465              | 0.0151                 |
| 20       | 0.1           | 1           | 1.02               | 0.0152                 |

**TABLE A.3 Simulation study:** Errors for estimating  $\beta$  and  $\tau$  when varying the prior mean of the amplitudes  $\mu_\beta$ , the prior variance of the latency  $\sigma_\tau$ , and the prior shape parameter  $a_\rho$  of the GP length scale  $\rho$ .

48 The model based test of difference across conditions was conducted by computing the 95% posterior credible  
49 interval of the difference in mean amplitude between the two groups, and concluding significance if the interval  
50 does not include zero. For comparison, we conducted an empirical test by computing a 95% bootstrap confidence  
51 interval of the difference in global means between the two groups; for each bootstrap replicate, this was obtained  
52 by first computing the empirical group mean signals, taking the average over time of the group means, and taking  
53 the difference of these group mean averages. This test procedure is similar to methods used in the ERP literature for  
54 detecting amplitude-based group differences [1, 2]. The estimated powers and simulation settings are given in Table  
55 A.2. The results show that the power of the RPAGP test is substantially greater than that of the empirical method  
56 in the majority of simulation settings considered, and is universally better than the empirical method for the largest  
57 sample size  $n = 30$ .

### 58 A.3 | Sensitivity analysis

59 Finally, we used simulated data to evaluate the sensitivity of the model with respect to the specification of the priors,  
60 by repeating the previous simulation for varying choices of prior hyperparameters for  $\rho$ ,  $\tau$ , and  $\beta$ . Specifically, we  
61 considered the following changes: the prior  $\rho \sim \text{Gamma}(a_\rho, 1)$  for various choices of  $a_\rho$ ; the prior  $\beta_i \sim \mathcal{N}(\mu_\beta, \sigma_\beta)$   
62 varying  $\mu_\beta$ ; the prior for  $\tau$  for varying  $\sigma_\tau$ . Results are shown in Table A.3. Due to the unidentifiable scale of the  $\beta$   
63 parameters, estimation accuracy for  $\beta$  is computed in terms of the error the ratio of mean amplitudes between the  
64 two groups to the true ratio of group amplitudes, i.e.  $\beta_B/\beta_A - \mu_B/\mu_A$ , which is then averaged over simulation replicates.  
65 Estimation accuracy of the parameters  $\tau$  is reported as the mean squared error in estimating the trial-specific latencies  
66  $MSE_\tau(\hat{\tau}) = \frac{1}{n} \sum_{i=1}^n (\hat{\tau}_i - \tau_i)^2$ , averaged across simulation replicates for each setting.

67 The RPAGP estimation is stable with respect to changes in the prior shape parameter, with some increase in the  
68 error of the estimated parameters observed for  $\mu_\beta = 10$ . For these settings, the model is robust to changes in  $\sigma_\tau$ , with  
69 essentially no difference in errors across the parameter values considered. The model is mostly insensitive to changes

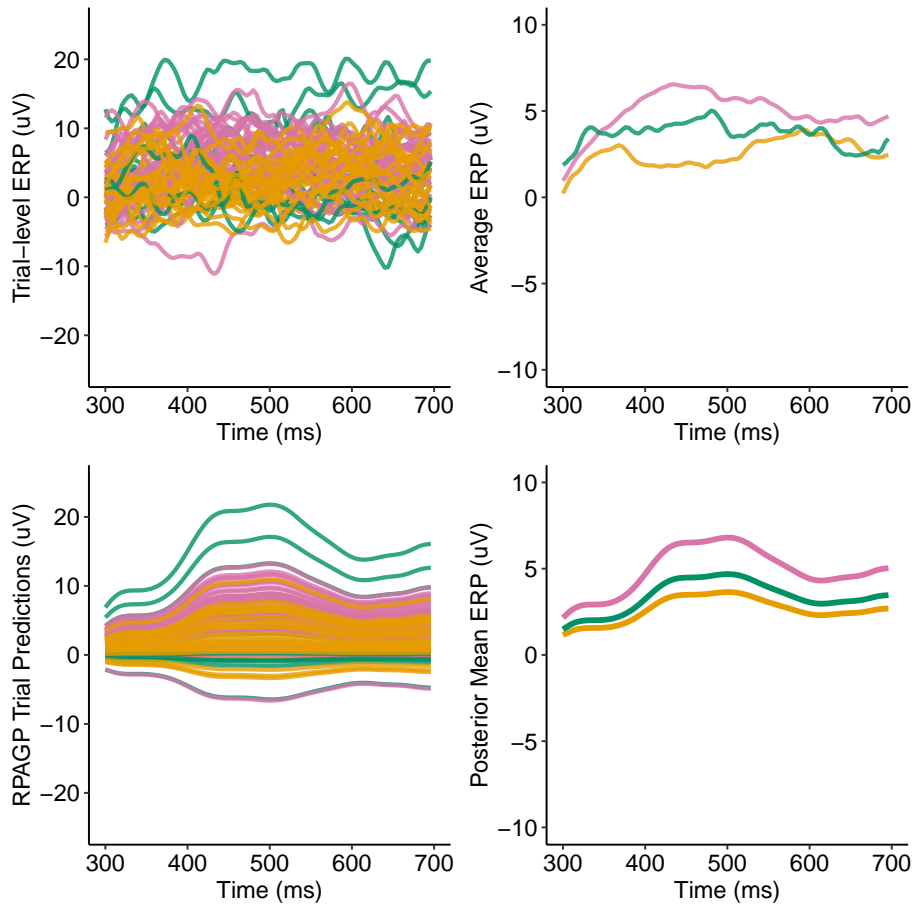

**FIGURE A.2** (top) Raw trial data from a single subject and means by condition. (bottom) Temporally-aligned RPAGP trial predictions, estimated via the posterior median, and means by condition obtained by averaging the trial estimates.

70 in the length scale shape parameter, but shows an increase in the estimation of the amplitude ratio for  $a_p = 20$ .

#### 71 **A.4 | Additional results on real ERP data**

72 Figures A.2, A.3, A.4 and A.5 show raw trial data and means by condition (top), together with the temporally-aligned  
 73 RPAGP trial predictions and the means by condition obtained by averaging the trial estimates (bottom), for 4 subjects,  
 74 two of them satisfying the expected LPP mean relationships among conditions and two who do not.

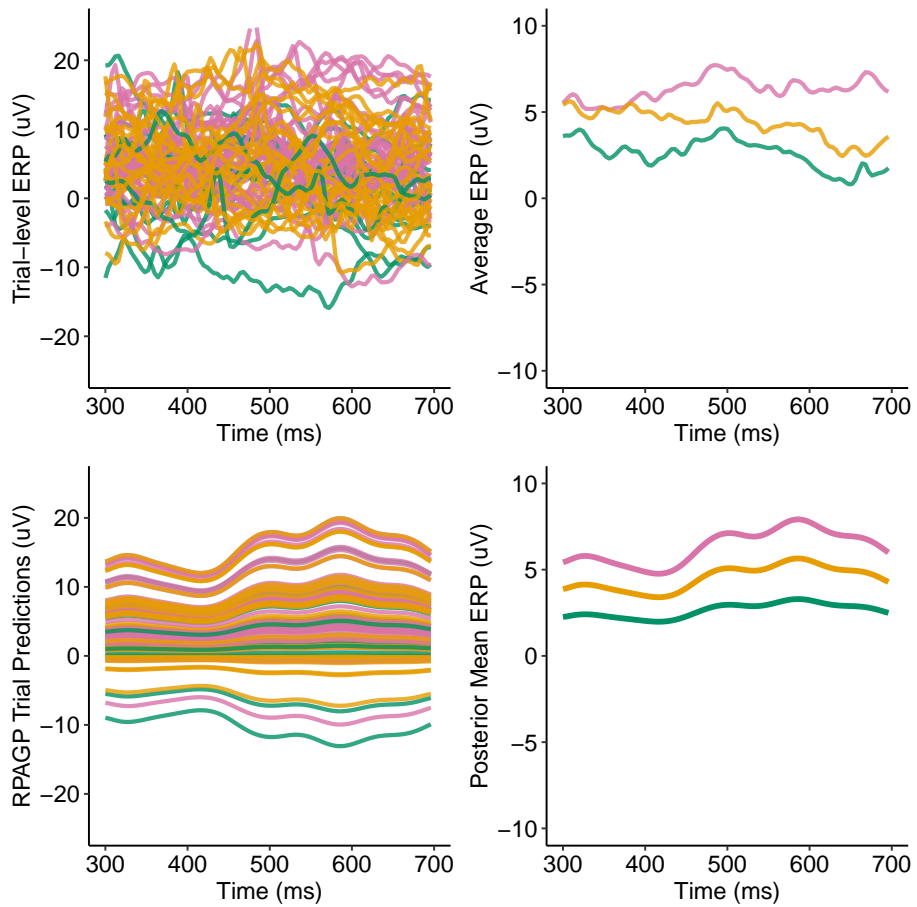

**FIGURE A.3** (top) Raw trial data from a single subject and means by condition. (bottom) Temporally-aligned RPAGP trial predictions, estimated via the posterior median, and means by condition obtained by averaging the trial estimates.

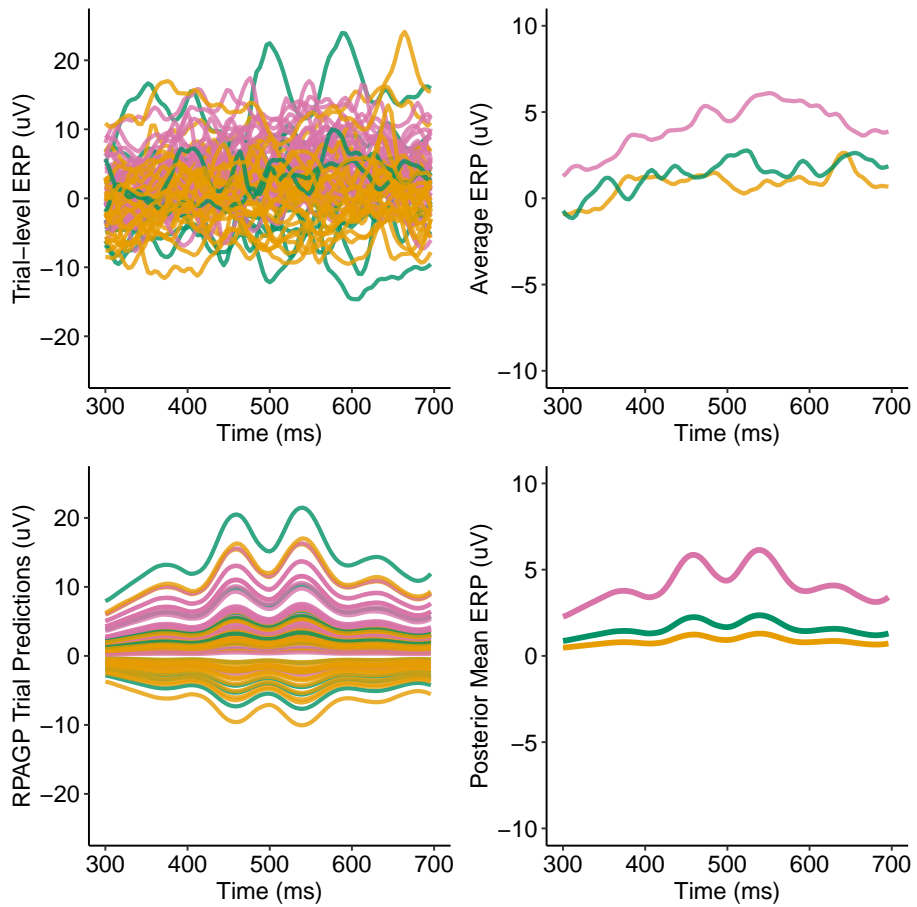

**FIGURE A.4** (top) Raw trial data from a single subject and means by condition. (bottom) Temporally-aligned RPAGP trial predictions, estimated via the posterior median, and means by condition obtained by averaging the trial estimates.

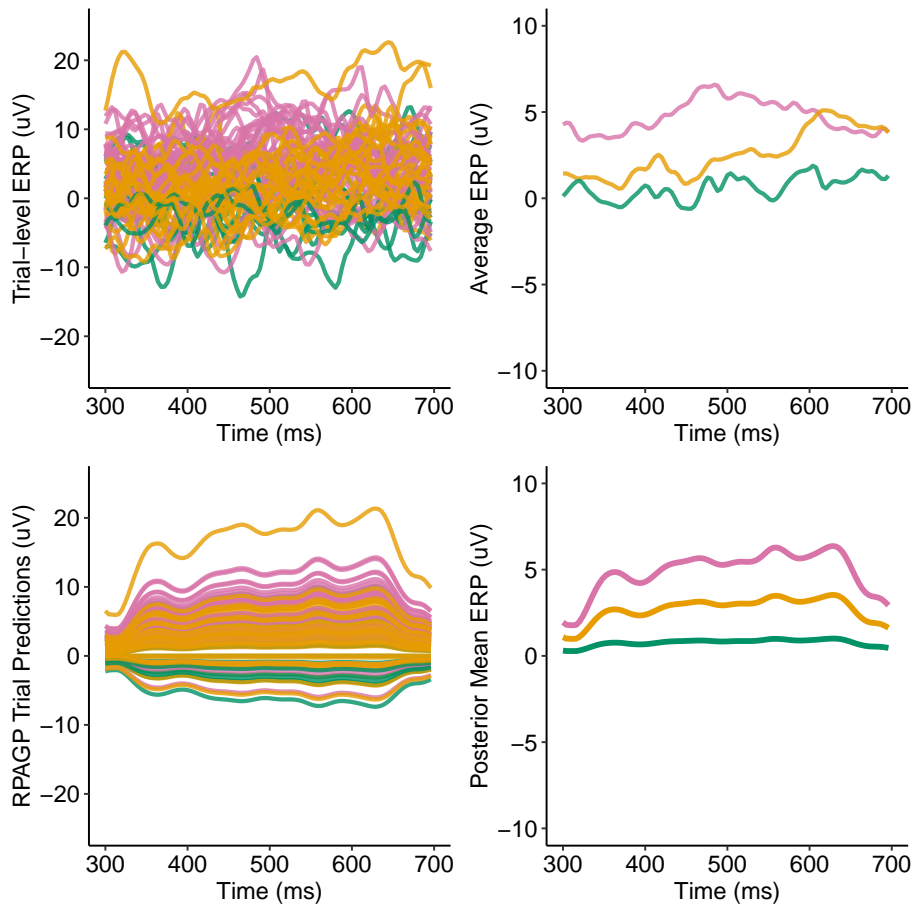

**FIGURE A.5** (top) Raw trial data from a single subject and means by condition. (bottom) Temporally-aligned RPAGP trial predictions, estimated via the posterior median, and means by condition obtained by averaging the trial estimates.



75 **References**

- 76 [1] Rousselet GA, Husk JS, Pernet CR, Gaspar CM, Bennett PJ, Sekuler AB. Age-related delay in information accrual for faces:  
77 evidence from a parametric, single-trial EEG approach. *Bmc Neuroscience* 2009;10(1):1–20.
- 78 [2] Abootalebi V, Moradi MH, Khalilzadeh MA. A comparison of methods for ERP assessment in a P300-based GKT. *Inter-  
79 national Journal of Psychophysiology* 2006;62(2):309–320.
